# Supplementary material for: Caloric restriction effects on liver mTOR signaling are time-of-day dependent
Source: publisher site journal article supplement (doi:10.18632/aging.101498), 2018-07-16
Supplement: Supplementary file [file aging-v10i7-101498-supplementary-material-SD1.pdf]

**Supplementary Table 1. Analysis of circadian rhythms by JTK software.**

|                                             | P value | Phase | Circadian |
|---------------------------------------------|---------|-------|-----------|
| S6-S235 AL WT                               | 3.7e-07 | 14    | YES       |
| S6-S235 CR WT                               | 6.4e-06 | 16    | YES       |
| S6-S235 <i>Bmal1</i> <sup>-/-</sup> AL      | 0.45    | 16    | NO        |
| S6-S235 <i>Bmal1</i> <sup>-/-</sup> CR      | 1.1e-05 | 18    | YES       |
| S6-S235 <i>Cry1,2</i> <sup>-/-</sup> AL     | 0.14    | 2     | NO        |
| S6-S235 <i>Cry1,2</i> <sup>-/-</sup> CR     | 0.74    | 18    | NO        |
| AKT-S473 AL WT                              | 0.04    | 14    | Yes       |
| AKT-S473 CR WT                              | 0.45    | 20    | No        |
| AKT-S473 <i>Bmal1</i> <sup>-/-</sup> AL     | 0.001   | 10    | Yes       |
| AKT-S473 <i>Bmal1</i> <sup>-/-</sup> CR     | 0.02    | 20    | Yes       |
| AKT-S473 <i>Cry1,2</i> <sup>-/-</sup> AL    | 1       | 10    | No        |
| AKT-S473 <i>Cry1,2</i> <sup>-/-</sup> CR    | 0.31    | 18    | No        |
| Pras40-S246 AL WT                           | 1       | 6     | No        |
| Pras40-S246 CR WT                           | 0.01    | 22    | Yes       |
| Pras40-S246 <i>Bmal1</i> <sup>-/-</sup> AL  | 0.0002  | 14    | Yes       |
| Pras40-S246 <i>Bmal1</i> <sup>-/-</sup> CR  | 0.26    | 14    | No        |
| Pras40-S246 <i>Cry1,2</i> <sup>-/-</sup> AL | 0.01    | 10    | Yes       |
| Pras40-S246 <i>Cry1,2</i> <sup>-/-</sup> CR | 1       | 18    | No        |
